# Supplementary material for: Geographically Widespread Swordfish Barcode Stock Identification: A Case Study of Its Application
Source: PLoS One. 2011 Oct 19;6(10):e25516. doi: 10.1371/journal.pone.0025516 (PMC3198442; doi:10.1371/journal.pone.0025516)
Supplement: Table S4 — List of dloop haplotypes. (XLS) [file pone.0025516.s004.xls]

## Sheet: Foglio1
	Table S4 - List of dloop haplotypes.
dloop Haplotype	N	Capture region	Accession number
Hap1	6	IND FAO51	JN083400
Hap2	4	IND FAO51	JN083401
Hap3	3	IND FAO51	JN083402
Hap4	2	ATL FAO27	JN083403
Hap5	1+1	ATL FAO27/MED FAO37	JN083404
Hap6	1	ATL FAO27	JN083405
Hap7	1	ATL FAO27	JN083406
Hap8	2	MED FAO37	JN083407
Hap9	3	MED FAO37	JN083408
Hap10	1	MED FAO37	JN083409
Hap11	3	MED FAO37	JN083410
Hap12	1	MED FAO37	JN083411
Hap13	2	MED FAO37	JN083412
Hap14	2	MED FAO37	JN083413
Hap15	3	MED FAO37	JN083414
Hap16	1	ATL FAO27	JN083415
Hap17	1	ATL FAO27	JN083416
Hap18	1	ATL FAO27	JN083417
Hap19	1	ATL FAO27	JN083418
Hap20	1	ATL FAO27	JN083419
Hap21	1	ATL FAO27	JN083420
Hap22	1	ATL FAO27	JN083421
Hap23	1	ATL FAO27	JN083422
Hap24	1	ATL FAO27	JN083423
Hap25	1	ATL FAO27	JN083424
Hap26	1	ATL FAO27	JN083425
Hap27	1	ATL FAO27	JN083426
Hap28	1+2	ATL FAO27/IND FAO51	JN083427
Hap29	1	ATL FAO27	JN083428
Hap30	1	ATL FAO27	JN083429
Hap31	2	MED FAO37	JN083430
Hap32	5	MED FAO37	JN083431
Hap33	1	MED FAO37	JN083432
Hap34	1	MED FAO37	JN083433
Hap35	1	MED FAO37	JN083434
Hap36	2	MED FAO37	JN083435
	N = number of specimens.
